# Supplementary material for: A Fine-Tuned Lipophilicity/Hydrophilicity Ratio Governs Antibacterial Potency and Selectivity of Bifurcated Halogen Bond-Forming NBTIs
Source: MDPI journal article supplement (doi:10.3390/antibiotics10070862), 2021-07-15
Supplement: s1 [file s1]

## Supporting Information

# **A Fine-tuned Lipophilicity/Hydrophilicity Ratio Governs Antibacterial Potency and Selectivity of Bifurcated Halogen Bond-Forming NBTIs**

Anja Kolarič, Maja Kokot, Martina Hrast, Matjaž Weiss, Irena Zdovc, Jurij Trontelj, Simon Žakelj, Marko Anderluh,\* and Nikola Minovski\*

**Table S1. The HPLC method parameters, equilibrium solubility at pH 6.8 and PAMPA permeability of our NBTIs and reference compounds.**

| Cmpd               | HPLC method parameters |                         |             | Equilibrium solubility at pH 6.8 |                                                   | PAMPA permeability |                              | clogP <sup>a</sup> | logD <sup>b</sup> |
|--------------------|------------------------|-------------------------|-------------|----------------------------------|---------------------------------------------------|--------------------|------------------------------|--------------------|-------------------|
|                    | %B                     | $\Lambda_{max}$<br>[nm] | RT<br>[min] | [mg/L]                           | max.<br>dose for<br>"high"<br>solubility<br>in mg | [nm/s]             | classification<br>[low/high] |                    |                   |
| <b>3</b>           | 11                     | 324                     | 3.0         | 349                              | 174                                               | 54                 | high                         | 3.02               | 1.45              |
| <b>4</b>           | 17                     | 250                     | 2.8         | 585                              | 293                                               | 142                | high                         | 3.86               | 1.9               |
| <b>5</b>           | 16                     | 212                     | 3.3         | 381                              | 191                                               | 255                | high                         | 3.63               | 1.75              |
| <b>6</b>           | 5                      | 216                     | 2.6         | 797                              | 399                                               | 56                 | high                         | 3.56               | 0.75              |
| <b>7</b>           | 18                     | 240                     | 2.5         | 883                              | 441                                               | 26                 | intermediate                 | 2.76               | 0.89              |
| <b>8</b>           | 15                     | 212                     | 4.0         | 106                              | 53                                                | 106                | high                         | 3.68               | 1.25              |
| <b>9</b>           | 10                     | 214                     | 2.8         | 7551                             | 3776                                              | 33                 | high                         | 2.53               | 0.84              |
| <b>10</b>          | 7                      | 216                     | 3.2         | 5696                             | 2848                                              | 41                 | high                         | 2.47               | 0.79              |
| <b>11</b>          | 8                      | 212                     | 3.3         | 1369                             | 684                                               | 109                | high                         | 3.58               | 1.17              |
| <b>12</b>          | 10                     | 212                     | 2.7         | 460                              | 230                                               | 121                | high                         | 3.72               | 1.47              |
| <b>13</b>          | 15                     | 216                     | 2.9         | 119                              | 59                                                | 132                | high                         | 4.29               | 1.89              |
| <b>14</b>          | 16                     | 216                     | 2.9         | 72                               | 36                                                | 315                | high                         | 4.44               | 2.02              |
| <b>15</b>          | 22                     | 214                     | 2.7         | 184                              | 92                                                | 398                | high                         | 4.70               | 2.18              |
| <b>16</b>          | 6                      | 214                     | 2.3         | 3387                             | 1694                                              | 15                 | intermediate                 | 2.54               | 0.44              |
| <b>17</b>          | 6                      | 216                     | 2,1         | 560                              | 280                                               | 3.1                | low                          | 2.09               | 0.19              |
| <b>18</b>          | 12                     | 214                     | 3.1         | 537                              | 268                                               | 167                | high                         | 3.74               | 0.18              |
| <b>19</b>          | 16                     | 216                     | 2.7         | 79                               | 39                                                | 90                 | high                         | 3.68               | 2.00              |
| <b>20</b>          | 11                     | 214                     | 3.2         | 103                              | 52                                                | 30                 | high                         | 3.21               | 2.07              |
| <b>21</b>          | 13                     | 214                     | 2.11        | 209                              | 104                                               | 83                 | high                         | 3.11               | 1.63              |
| <b>22</b>          | 9                      | 216                     | 2,1         | 1460                             | 730                                               | 82                 | high                         | 2.73               | 0.76              |
| <b>Metoprolol</b>  | 18                     | 222                     | 2.6         | 30394                            | 15197                                             | 42                 | high                         | /                  | /                 |
| <b>Verapamil</b>   | 34                     | 230                     | 2.9         | 2684                             | 1342                                              | 462                | high                         | /                  | /                 |
| <b>Theophyllin</b> | 5                      | 274                     | 3.0         | 8218                             | 4109                                              | 27                 | high                         | /                  | /                 |
| <b>Digoxin</b>     | 31                     | 222                     | 3.0         | 52                               | 26                                                | 5.8                | intermediate                 | /                  | /                 |
| <b>Atenolol</b>    | 5                      | 224                     | 2.8         | 21324                            | 10662                                             | 0.31               | low                          | /                  | /                 |
| <b>Furosemide</b>  | 29                     | 274                     | 2.8         | 3752                             | 1876                                              | 0.18               | low                          | /                  | /                 |

<sup>a</sup>clogP was calculated with ChemDraw 15.0.0.106. <sup>b</sup>logD was calculated at pH = 7.4 with MarvinSketch 20.17.

**Table S2. Comparison of *S. aureus* DNA gyrase IC<sub>50</sub> and the lengths of RHS fragments for our previously published compound 13 and known NBTIs.**

| Compd                                                   | 13 <sup>1</sup>                                                                   | GSK299423 <sup>2</sup>                                                            | AM8191 <sup>3</sup>                                                                | ACT387042 <sup>4</sup>                                                              |
|---------------------------------------------------------|-----------------------------------------------------------------------------------|-----------------------------------------------------------------------------------|------------------------------------------------------------------------------------|-------------------------------------------------------------------------------------|
| Structure                                               | 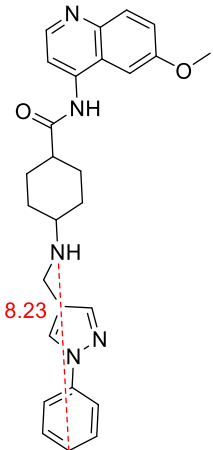 |  |  |  |
| <i>S. aureus</i><br>DNA gyrase<br>IC <sub>50</sub> (μM) | 0.83                                                                              | 0.014                                                                             | 0.22                                                                               | 0.125                                                                               |

Atom distances depicted in red dots are in Å.

**Table S3. Selected templates for homology modelling.**

| Compd                          | <i>E. coli</i> | <i>S. aureus</i> |
|--------------------------------|----------------|------------------|
| ParC (protein ID from Uniprot) | P0AFI2         | Q2FYS4           |
| ParE (protein ID from Uniprot) | P20083         | Q2FYS5           |
| Template protein (PDB ID)      | 3ksa           | 3raf             |
| GMQE                           | 0.41           | 0.45             |
| Identity                       | 43.0           | 68.3             |
| Resolution                     | 3.3            | 3.2              |

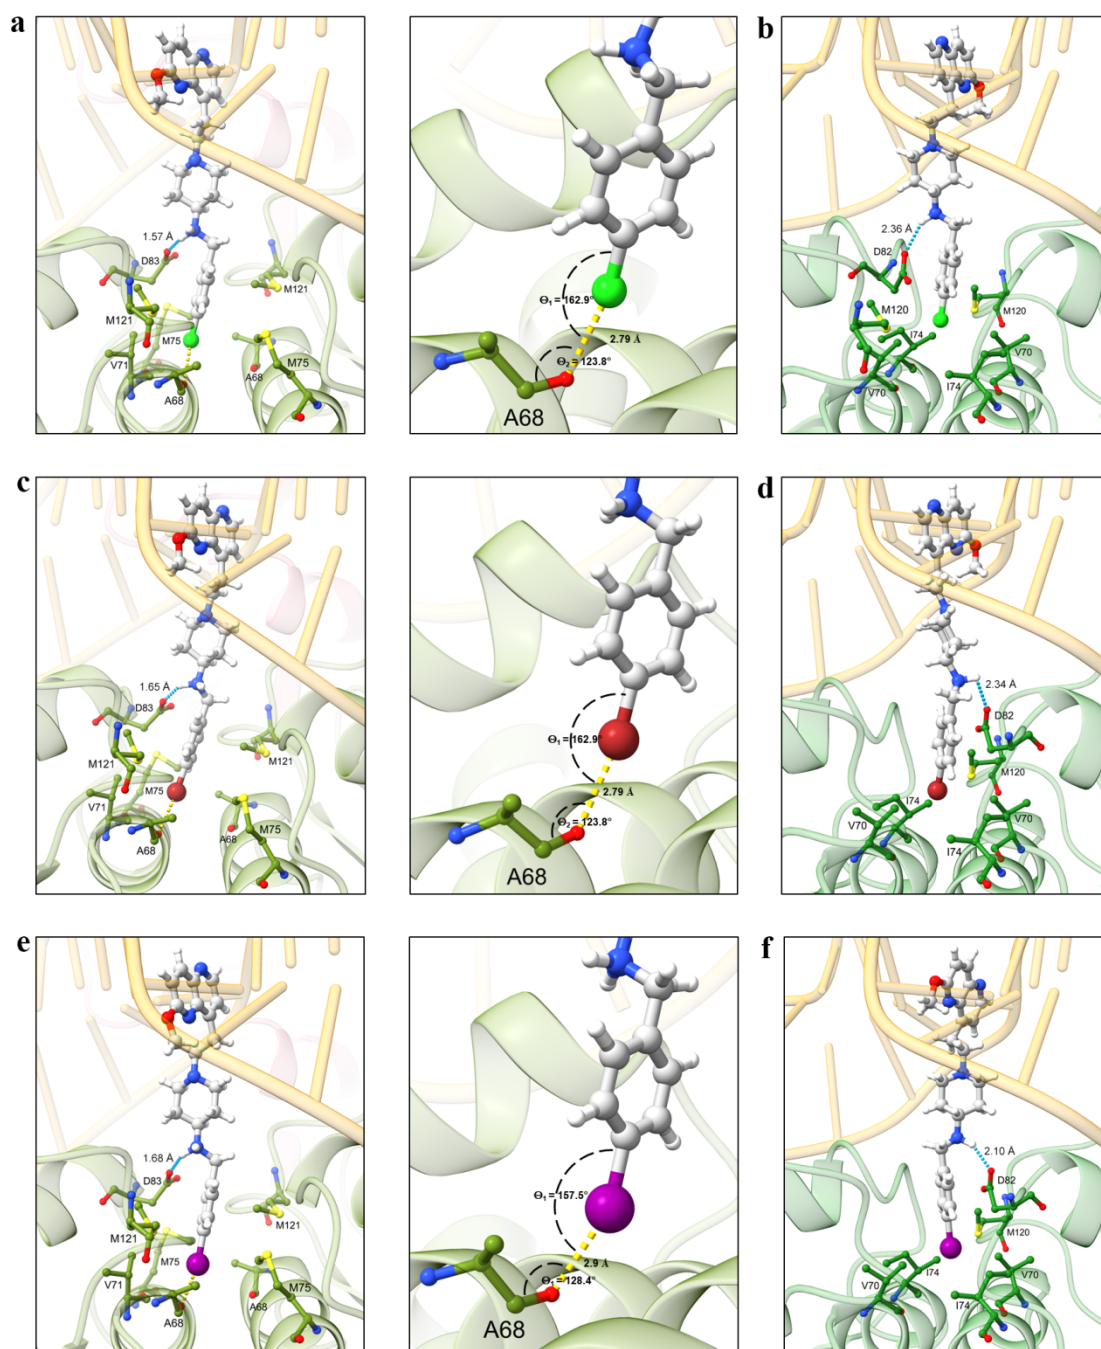

**Figure S1.** Predicted binding modes of compound **13-15** within the *S. aureus* and *E. coli* DNA gyrase NBTIs binding site (PDB ID: 2XCS<sup>2</sup> and our constructed homology model, respectively), revealing key intermolecular interactions and a close view of predicted halogen bonding. **a)** compound **13** within *S. aureus* DNA gyrase **b)** compound **13** within *E. coli* DNA gyrase **c)** compound **14** within *S. aureus* DNA gyrase **d)** compound **14** within *E. coli* DNA gyrase **e)** compound **15** within *S. aureus* DNA gyrase **f)** compound **15** within *E. coli* DNA gyrase. *S. aureus* and *E. coli* DNA gyrase are shown in dark and light green ribbons, respectively, compounds and amino acids are coloured by element (ball and sticks representation), while DNA in pale orange. Ionic interactions are represented as cyan dots and halogen-bonding interactions as yellow dots.

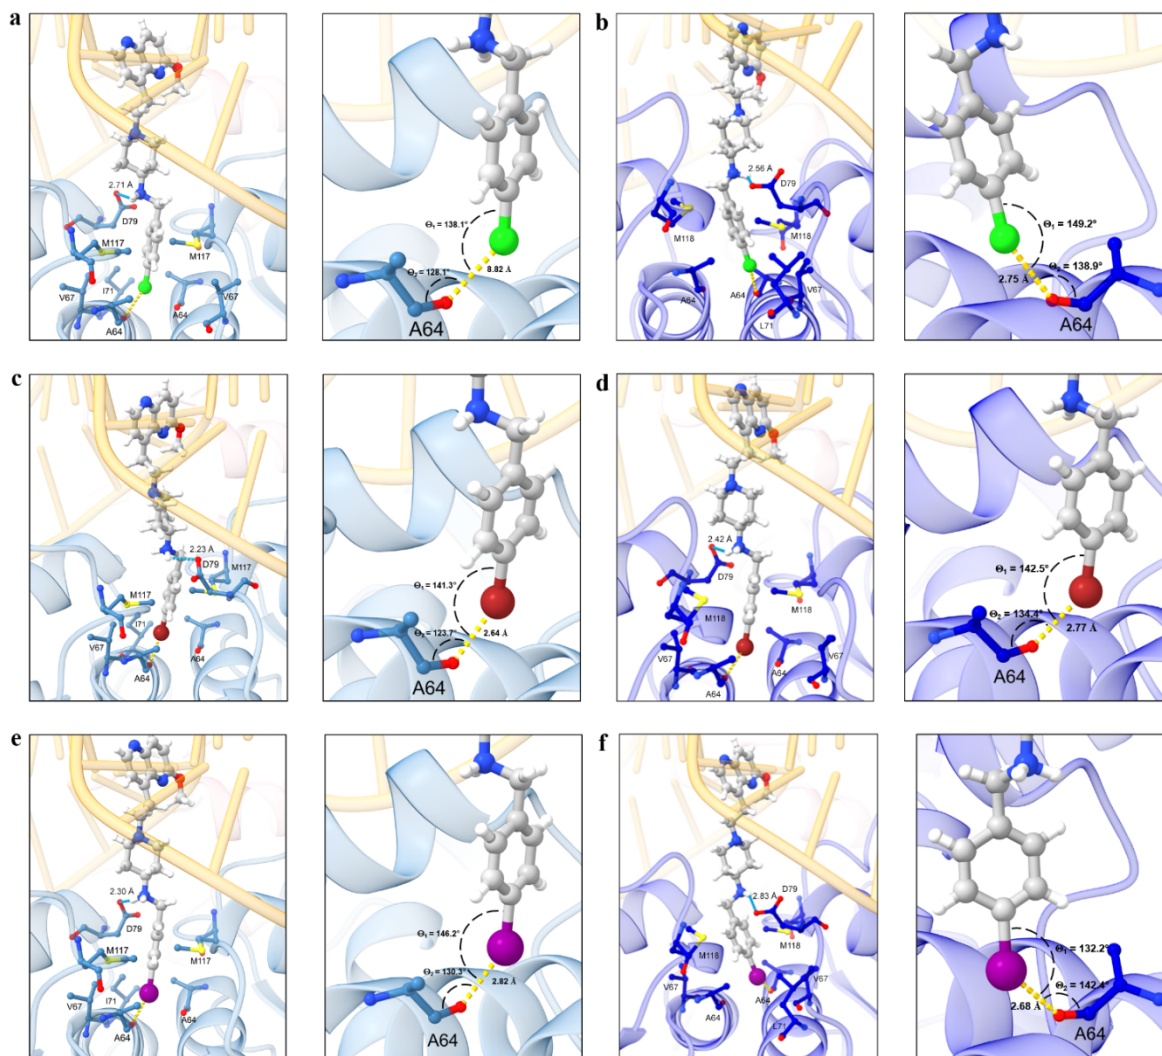

**Figure S2.** Predicted binding modes of compound **13-15** within the *S. aureus* and *E. coli* Topo IV NBTIs binding site (our constructed homology models), revealing key intermolecular interactions and a close view of predicted halogen bonding. **a)** compound **13** within *S. aureus* Topo IV **b)** compound **13** within *E. coli* Topo IV **c)** compound **14** within *S. aureus* Topo IV **d)** compound **14** within *E. coli* Topo IV **e)** compound **15** within *S. aureus* Topo IV **f)** compound **15** within *E. coli* Topo IV. *S. aureus* and *E. coli* Topo IV are shown in light and dark blue ribbons, respectively, compounds and amino acid residues are colored by element (ball and sticks representation), while DNA in pale orange. Ionic interactions are represented as cyan dots and halogen-bonding interactions as yellow dots.

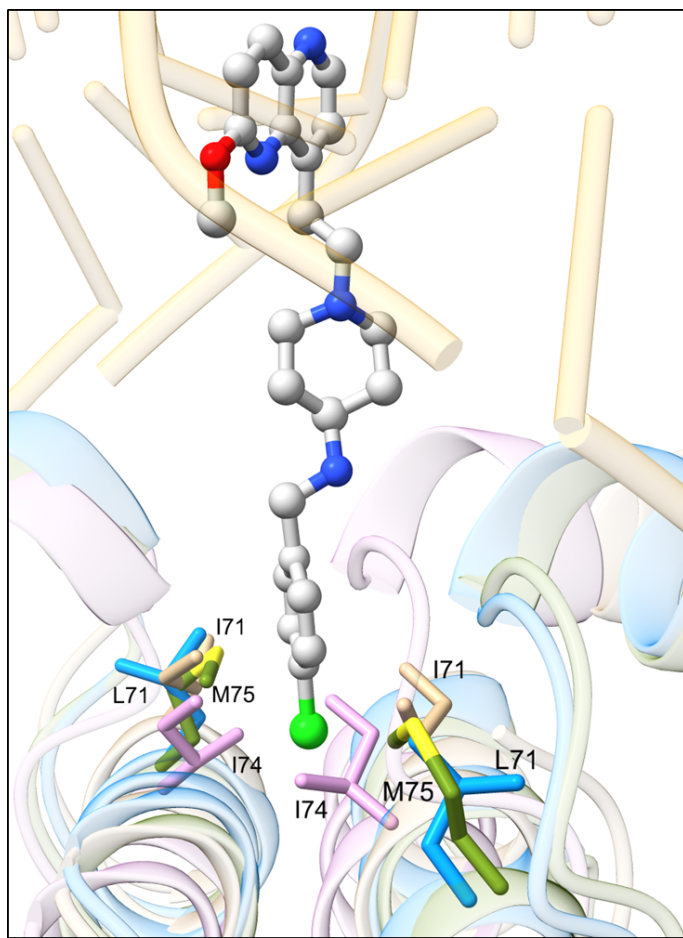

**Figure S3.** Met75 from *S. aureus* DNA gyrase (green, PDB code 6Z1A)(Kolarič et al., 2021) in comparison to Ile74 in *E. coli* DNA gyrase (violet, PDB code 4CKK),<sup>5</sup> Ile71 in *S. aureus* Topo IV ( beige, PDB code 2INR), and Leu71 in *E. coli* Topo IV homology model utilizing *Klebsiella pneumoniae* Topo IV structure as a template (blue, PDB code 5EIX).<sup>6</sup> For clarity, the corresponding GyrA and ParC subunits originating from *S. aureus* and *E. coli*, respectively, were used for the structural superimposition. Compound **13** (inset, silver)<sup>7</sup> was inserted for observation of steric hindrance. Enzymes are shown in ribbons, compound **13** (ball and sticks representation) and amino acids (sticks representation) are colored by element, while DNA in pale orange.

**Scheme S1. Synthesis of 2-phenyl-2*H*-1,2,3-triazole-4-carbaldehyde (**23**).**

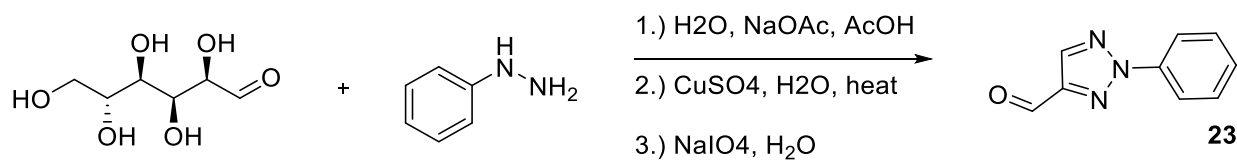

1-(2-(6-Methoxy-1,5-naphthyridin-4-yl)ethyl)-*N*-((1-methyl-1*H*-benzo[d]imidazol-2-yl)methyl)piperidin-4-amine (**3**)

Chemical structure of compound 10: CN1CCCC1Cc2nc3ccccc3nc2OC

<sup>1</sup>H NMR spectrum (CDCl<sub>3</sub>) of compound 10. The x-axis represents the chemical shift in ppm (f1), ranging from 9.5 to -0.5. The y-axis represents the intensity, ranging from -1000 to 13000. The spectrum shows several peaks, with the following chemical shifts (ppm) and integration values:

| Chemical Shift (ppm)                                                                                                                                                                                                                                                                                                                                                                                                                                                                                                                                                                                                                                                                                                                                                                                                                                                               | Integration                                          |
|------------------------------------------------------------------------------------------------------------------------------------------------------------------------------------------------------------------------------------------------------------------------------------------------------------------------------------------------------------------------------------------------------------------------------------------------------------------------------------------------------------------------------------------------------------------------------------------------------------------------------------------------------------------------------------------------------------------------------------------------------------------------------------------------------------------------------------------------------------------------------------|------------------------------------------------------|
| 8.66, 8.65                                                                                                                                                                                                                                                                                                                                                                                                                                                                                                                                                                                                                                                                                                                                                                                                                                                                         | 1.01                                                 |
| 8.19, 8.17                                                                                                                                                                                                                                                                                                                                                                                                                                                                                                                                                                                                                                                                                                                                                                                                                                                                         | 1.02                                                 |
| 7.74, 7.72, 7.72                                                                                                                                                                                                                                                                                                                                                                                                                                                                                                                                                                                                                                                                                                                                                                                                                                                                   | 0.95                                                 |
| 7.40, 7.35, 7.33, 7.33, 7.30, 7.29, 7.27, 7.25, 7.12                                                                                                                                                                                                                                                                                                                                                                                                                                                                                                                                                                                                                                                                                                                                                                                                                               | 1.03, 0.96, 0.96, 0.96, 0.96, 0.96, 0.96, 0.96, 0.96 |
| 4.12, 4.10, 4.07, 4.04, 4.02, 3.94                                                                                                                                                                                                                                                                                                                                                                                                                                                                                                                                                                                                                                                                                                                                                                                                                                                 | 1.96, 3.02, 2.98                                     |
| 3.40, 3.38, 3.36                                                                                                                                                                                                                                                                                                                                                                                                                                                                                                                                                                                                                                                                                                                                                                                                                                                                   | 2.04                                                 |
| 3.08, 3.05                                                                                                                                                                                                                                                                                                                                                                                                                                                                                                                                                                                                                                                                                                                                                                                                                                                                         | 1.92                                                 |
| 2.82, 2.80, 2.78, 2.76, 2.74, 2.72, 2.70, 2.68, 2.66, 2.64, 2.62, 2.60, 2.58, 2.56, 2.54, 2.52, 2.50, 2.48, 2.46, 2.44, 2.42, 2.40, 2.38, 2.36, 2.34, 2.32, 2.30, 2.28, 2.26, 2.24, 2.22, 2.20, 2.18, 2.16, 2.14, 2.12, 2.10, 2.08, 2.06, 2.04, 2.02, 2.00, 1.98, 1.96, 1.94, 1.92, 1.90, 1.88, 1.86, 1.84, 1.82, 1.80, 1.78, 1.76, 1.74, 1.72, 1.70, 1.68, 1.66, 1.64, 1.62, 1.60, 1.58, 1.56, 1.54, 1.52, 1.50, 1.48, 1.46, 1.44, 1.42, 1.40, 1.38, 1.36, 1.34, 1.32, 1.30, 1.28, 1.26, 1.24, 1.22, 1.20, 1.18, 1.16, 1.14, 1.12, 1.10, 1.08, 1.06, 1.04, 1.02, 1.00, 0.98, 0.96, 0.94, 0.92, 0.90, 0.88, 0.86, 0.84, 0.82, 0.80, 0.78, 0.76, 0.74, 0.72, 0.70, 0.68, 0.66, 0.64, 0.62, 0.60, 0.58, 0.56, 0.54, 0.52, 0.50, 0.48, 0.46, 0.44, 0.42, 0.40, 0.38, 0.36, 0.34, 0.32, 0.30, 0.28, 0.26, 0.24, 0.22, 0.20, 0.18, 0.16, 0.14, 0.12, 0.10, 0.08, 0.06, 0.04, 0.02, 0.00 | 1.99, 2.14, 2.10                                     |
| 0.01, 0.00, 0.01                                                                                                                                                                                                                                                                                                                                                                                                                                                                                                                                                                                                                                                                                                                                                                                                                                                                   | 1.00                                                 |

13C NMR spectrum of compound 10. The x-axis represents the chemical shift in ppm (f1), ranging from 170 to 0. The y-axis represents the intensity, ranging from -200 to 3800. The spectrum shows a large solvent peak at 77.35 ppm. Other labeled peaks include 161.43, 153.18, 147.70, 146.57, 145.25, 141.48, 140.96, 140.33, 136.16, 124.25, 122.49, 118.46, 119.46, 116.32, 109.09, 58.39, 53.74, 52.18, 43.89, 32.53, 29.96, 28.43, and 0.

*N*-((1-(4-Fluorophenyl)-1*H*-pyrazol-4-yl)methyl)-1-(2-(6-methoxy-1,5-naphthyridin-4-yl)ethyl)piperidin-4-amine (**4**)

<sup>1</sup>H NMR (400 MHz, CDCl<sub>3</sub>)

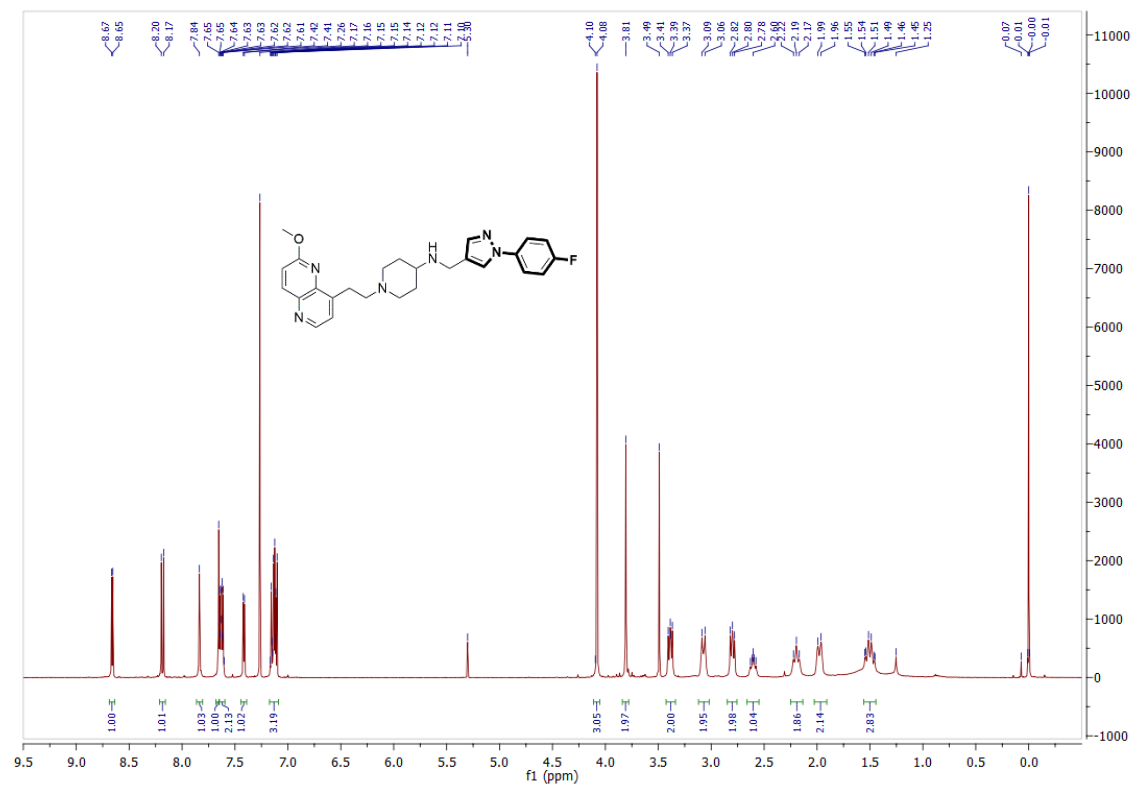

<sup>13</sup>C NMR (100 MHz, CDCl<sub>3</sub>)

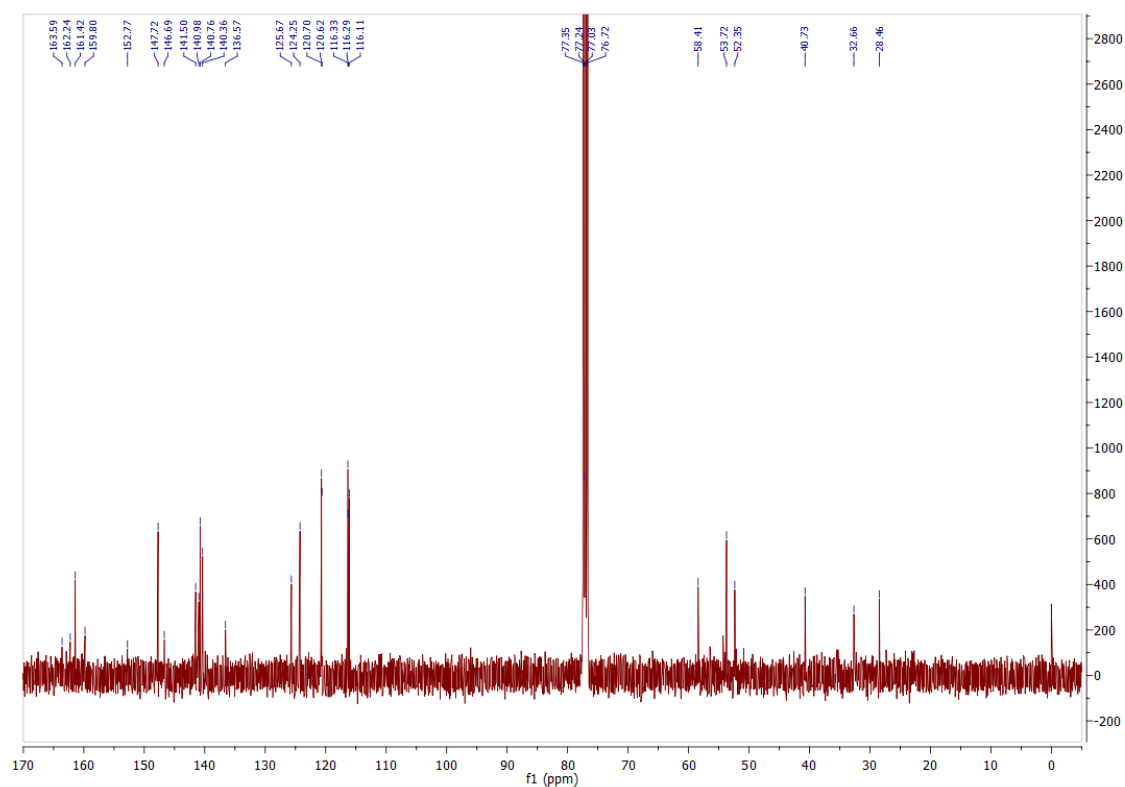



1-(2-(6-Methoxy-1,5-naphthyridin-4-yl)ethyl)-N-((1-phenyl-1H-pyrazol-4-yl)methyl)piperidin-4-amine (**5**)

$^1\text{H}$  NMR (400 MHz,  $\text{CDCl}_3$ )

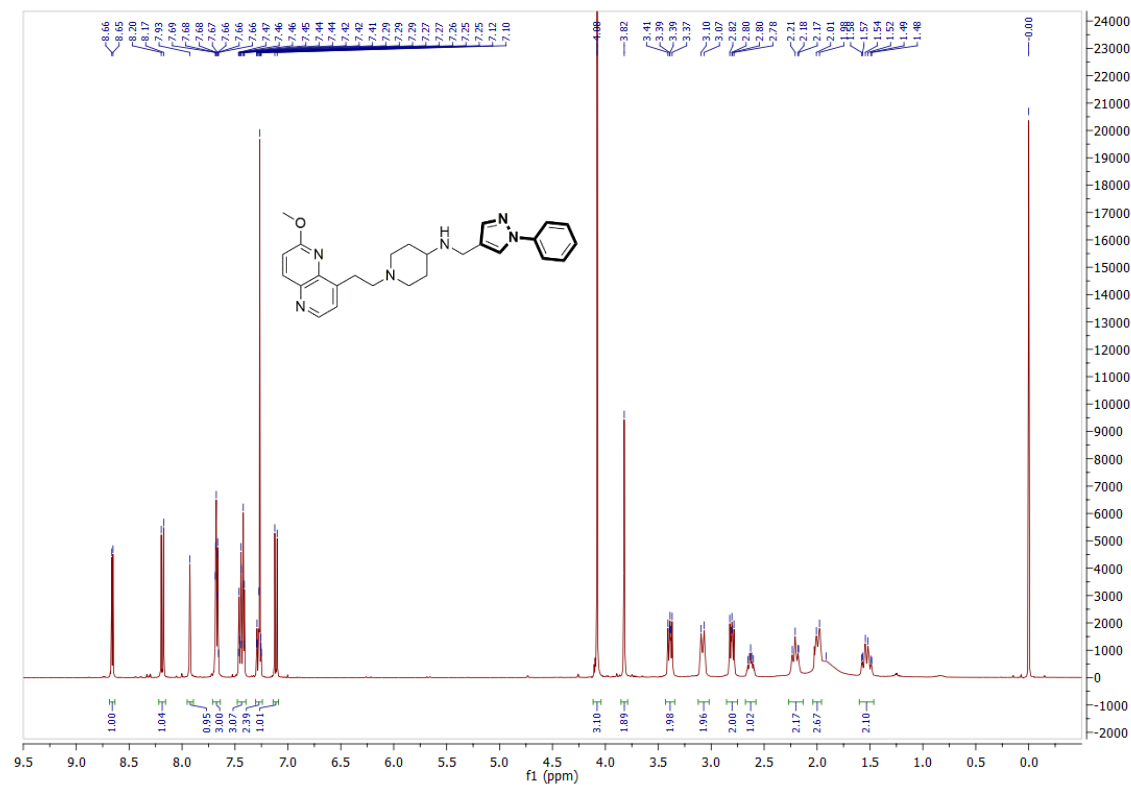

$^{13}\text{C}$  NMR (100 MHz,  $\text{CDCl}_3$ )

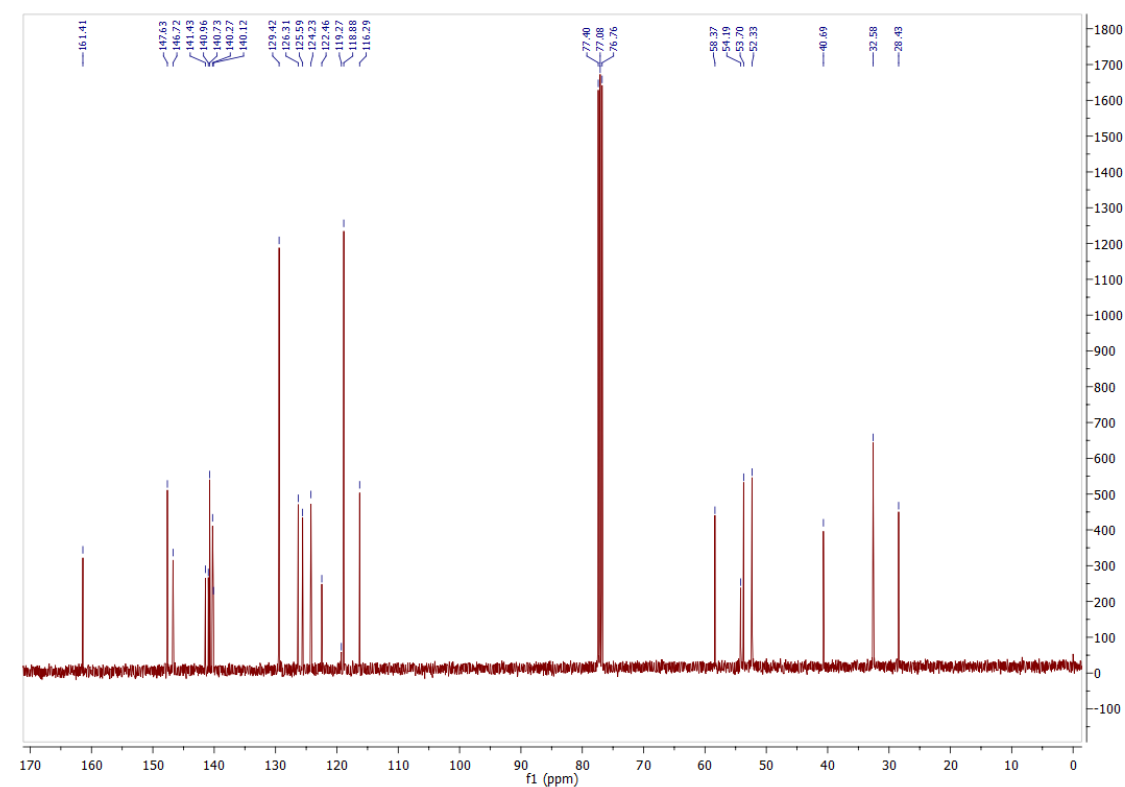

*N*-((2,8-dimethylimidazo[1,2-*a*]pyridin-3-yl)methyl)-1-(2-(6-methoxy-1,5-naphthyridin-4-yl)ethyl)piperidin-4-amine (**6**)

$^1\text{H}$  NMR (400 MHz,  $\text{CDCl}_3$ )

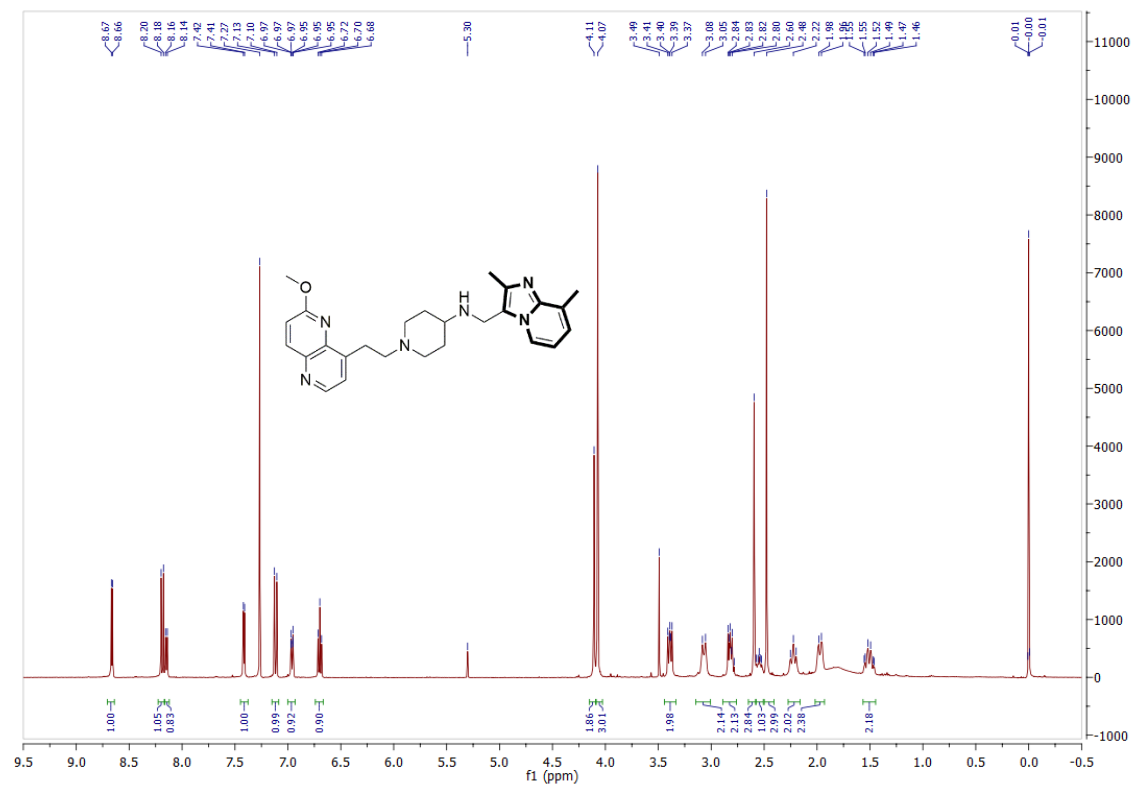

$^{13}\text{C}$  NMR (100 MHz,  $\text{CDCl}_3$ )

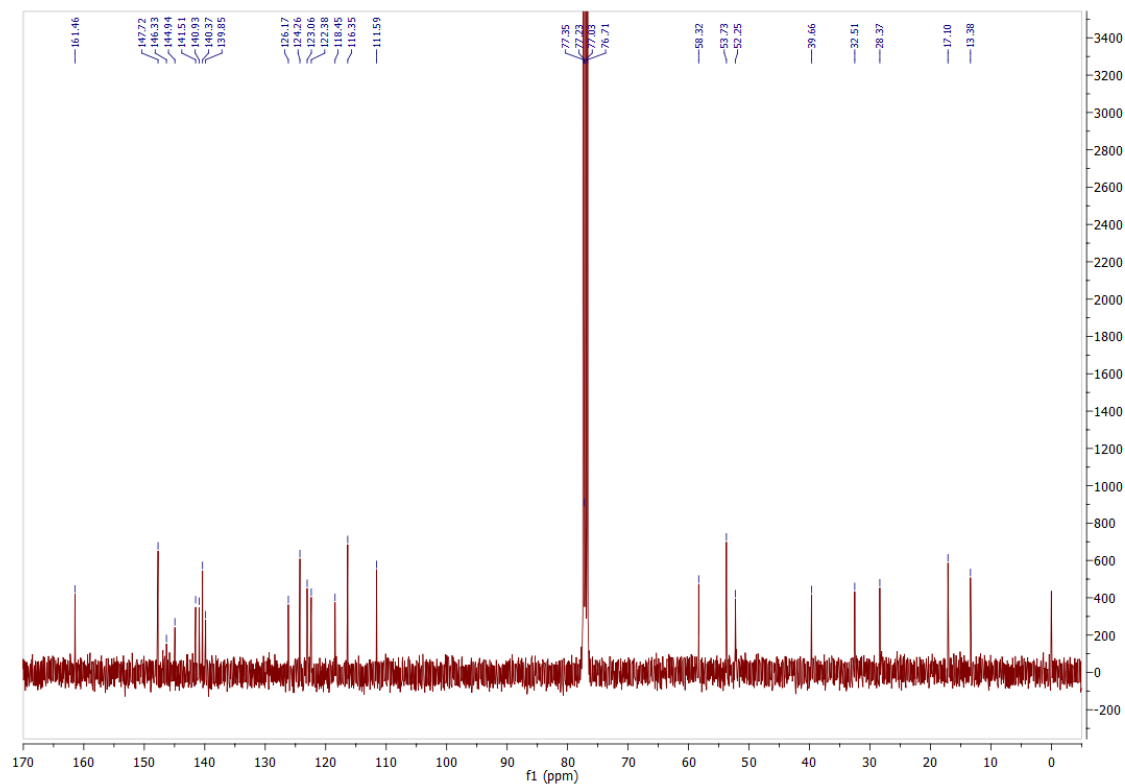

8-Cyano-*N*-(1-(2-(6-methoxy-1,5-naphthyridin-4-yl)ethyl)piperidin-4-yl)imidazo[1,2-*a*]pyridine-2-carboxamide (**7**)

$^1\text{H}$  NMR (400 MHz,  $\text{CDCl}_3$ )

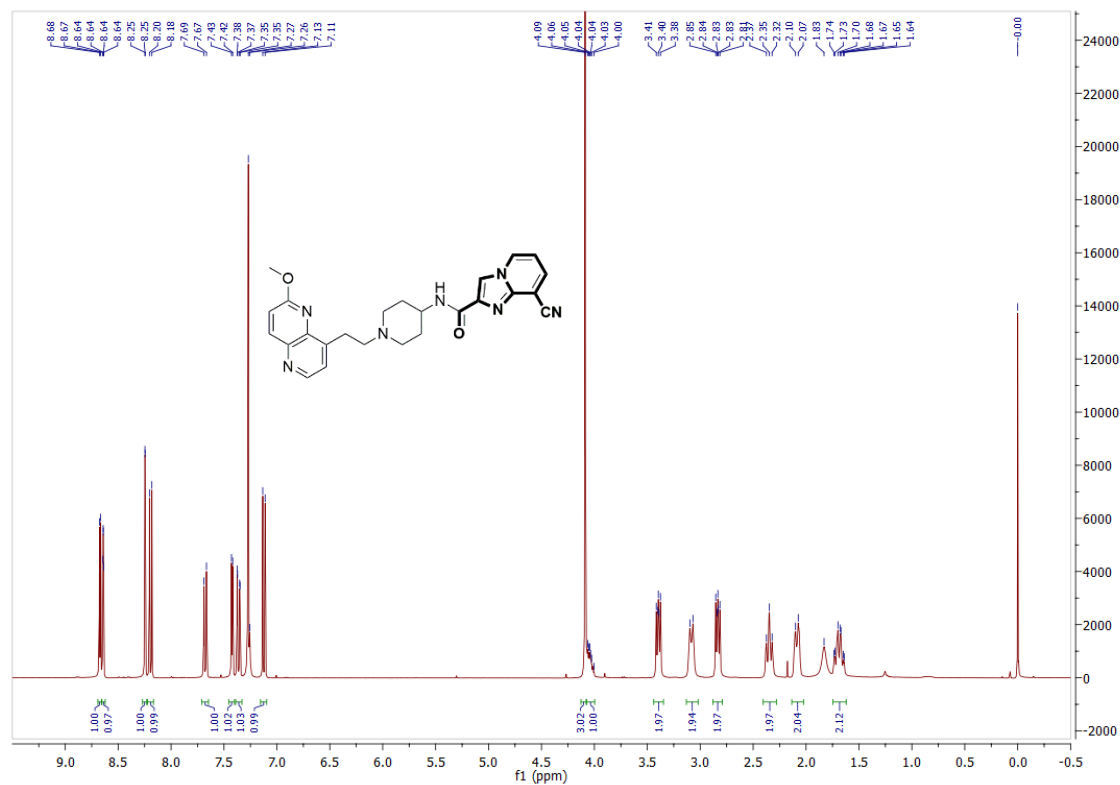

1-(2-(6-methoxy-1,5-naphthyridin-4-yl)ethyl)piperidin-4-amine (**8**)

<sup>1</sup>H NMR (400 MHz, CDCl<sub>3</sub>)

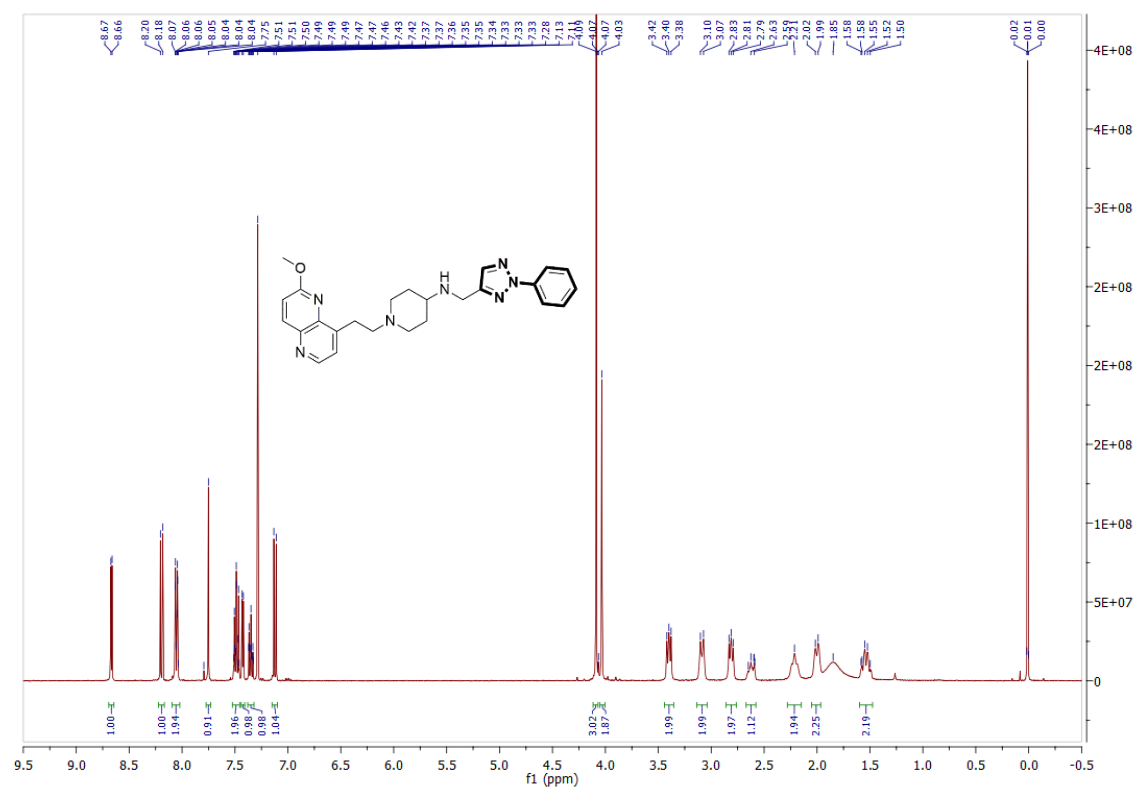

<sup>13</sup>C NMR (100 MHz, CDCl<sub>3</sub>)

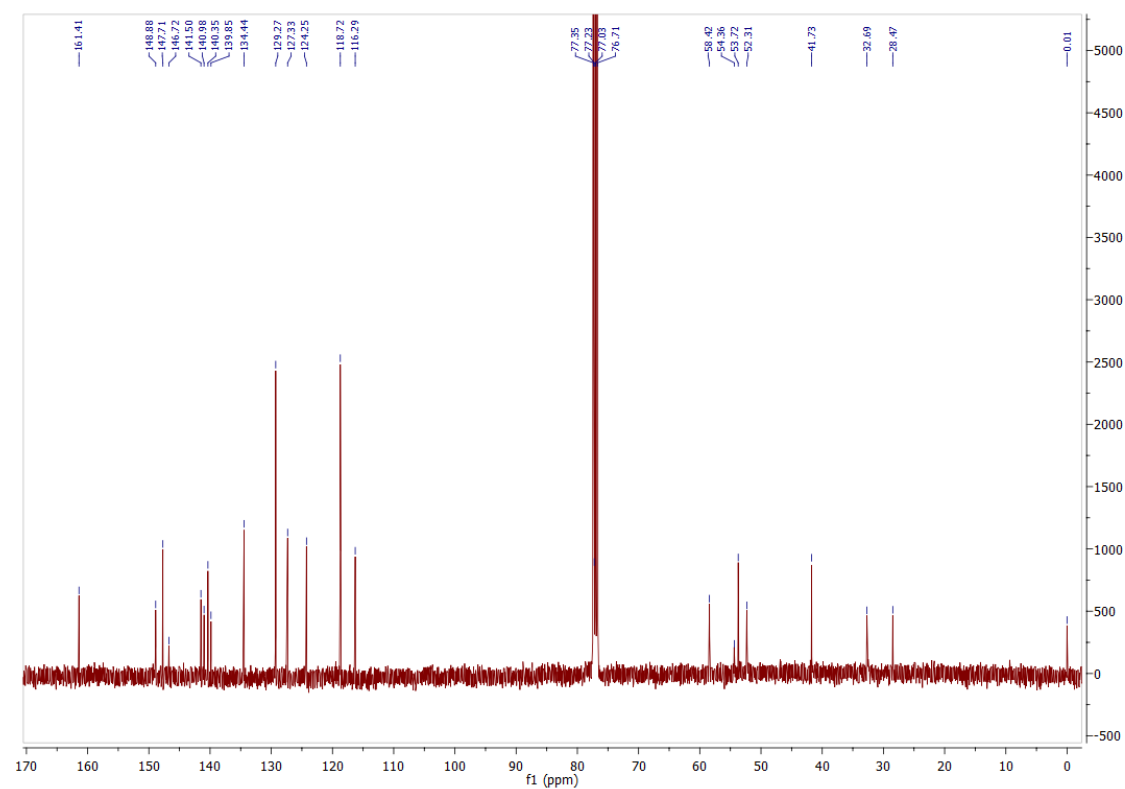

*N*-((1-isopropyl-1*H*-pyrazol-4-yl)methyl)-1-(2-(6-methoxy-1,5-naphthyridin-4-yl)ethyl)piperidin-4-amine (**9**)

<sup>1</sup>H NMR (400 MHz, CDCl<sub>3</sub>)

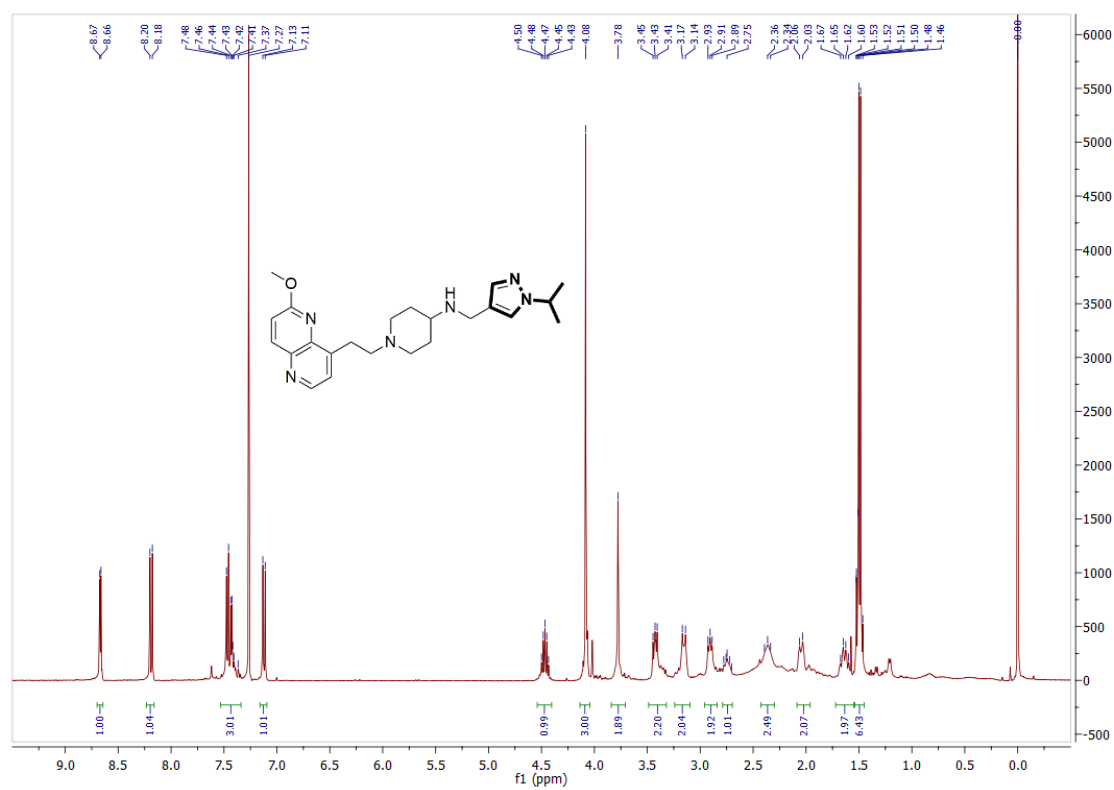

<sup>13</sup>C NMR (100 MHz, CDCl<sub>3</sub>)

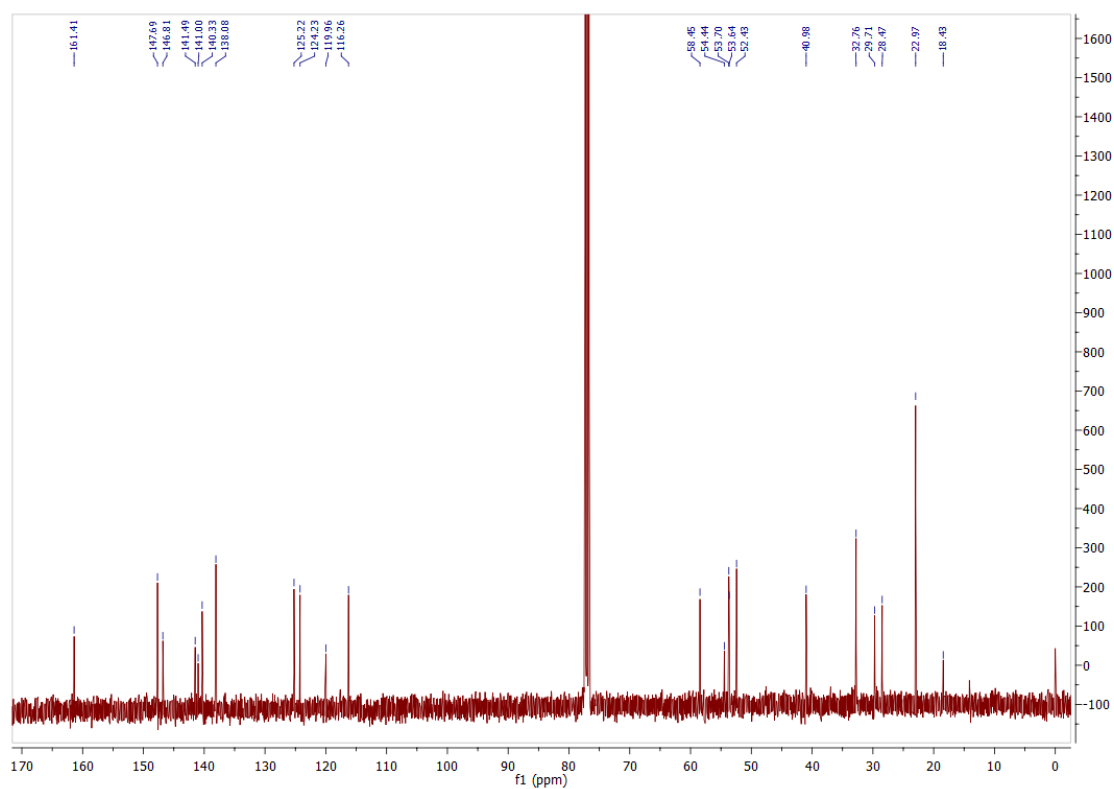

*N*-((1-allyl-1*H*-pyrazol-4-yl)methyl)-1-(2-(6-methoxy-1,5-naphthyridin-4-yl)ethyl)piperidin-4-amine (**10**)

<sup>1</sup>H NMR (400 MHz, CDCl<sub>3</sub>)

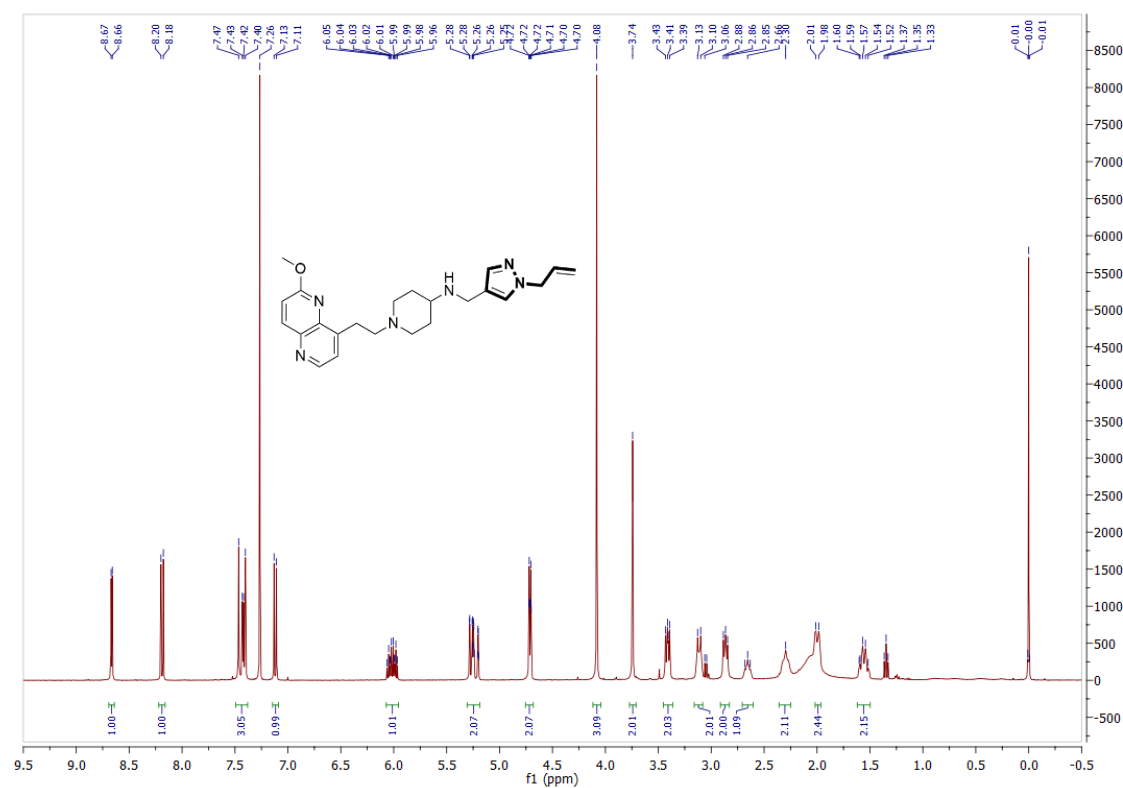

<sup>13</sup>C NMR (100 MHz, CDCl<sub>3</sub>)

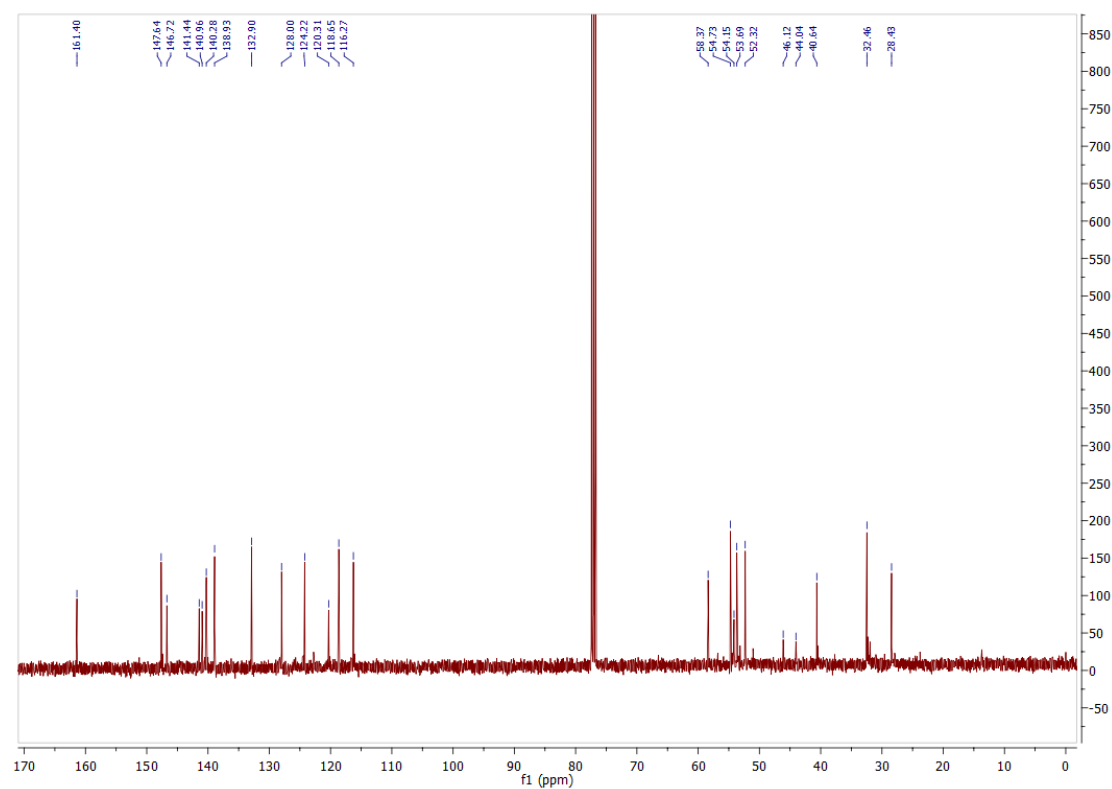

*N*-(4-(difluoromethoxy)-3-methoxybenzyl)-1-(2-(6-methoxy-1,5-naphthyridin-4-yl)ethyl)piperidin-4-amine (**19**)

<sup>1</sup>H NMR (400 MHz, CDCl<sub>3</sub>)

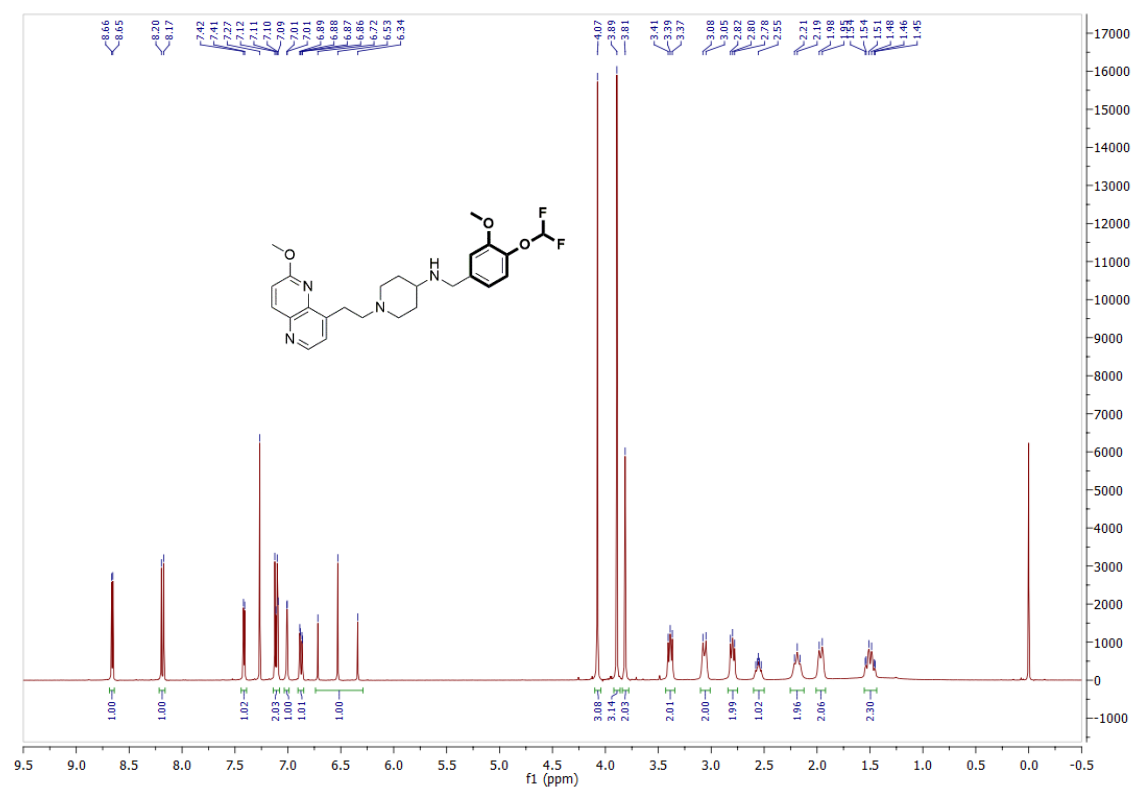

<sup>13</sup>C NMR (100 MHz, CDCl<sub>3</sub>)

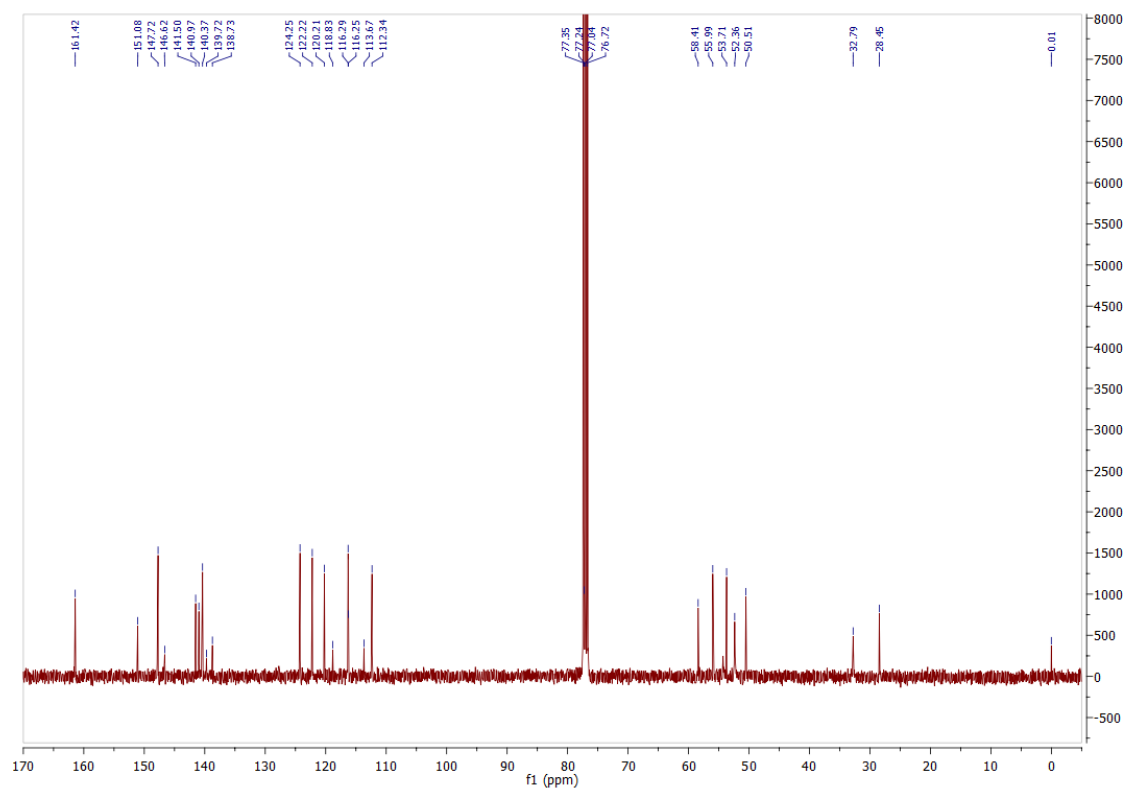

2-(difluoromethoxy)-5-((1-(2-(6-methoxy-1,5-naphthyridin-4-yl)ethyl)piperidin-4-ylamino)methyl)phenol (**20**)

<sup>1</sup>H NMR (400 MHz, CDCl<sub>3</sub>)

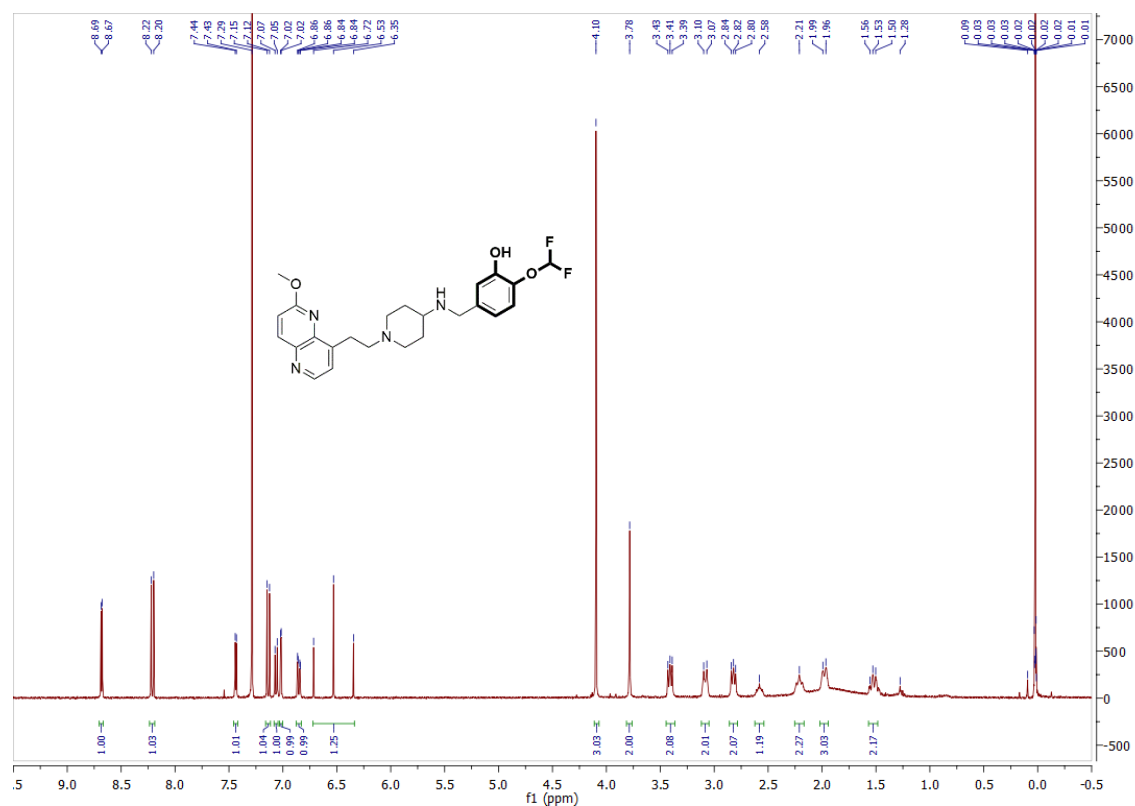

<sup>13</sup>C NMR (100 MHz, CDCl<sub>3</sub>)

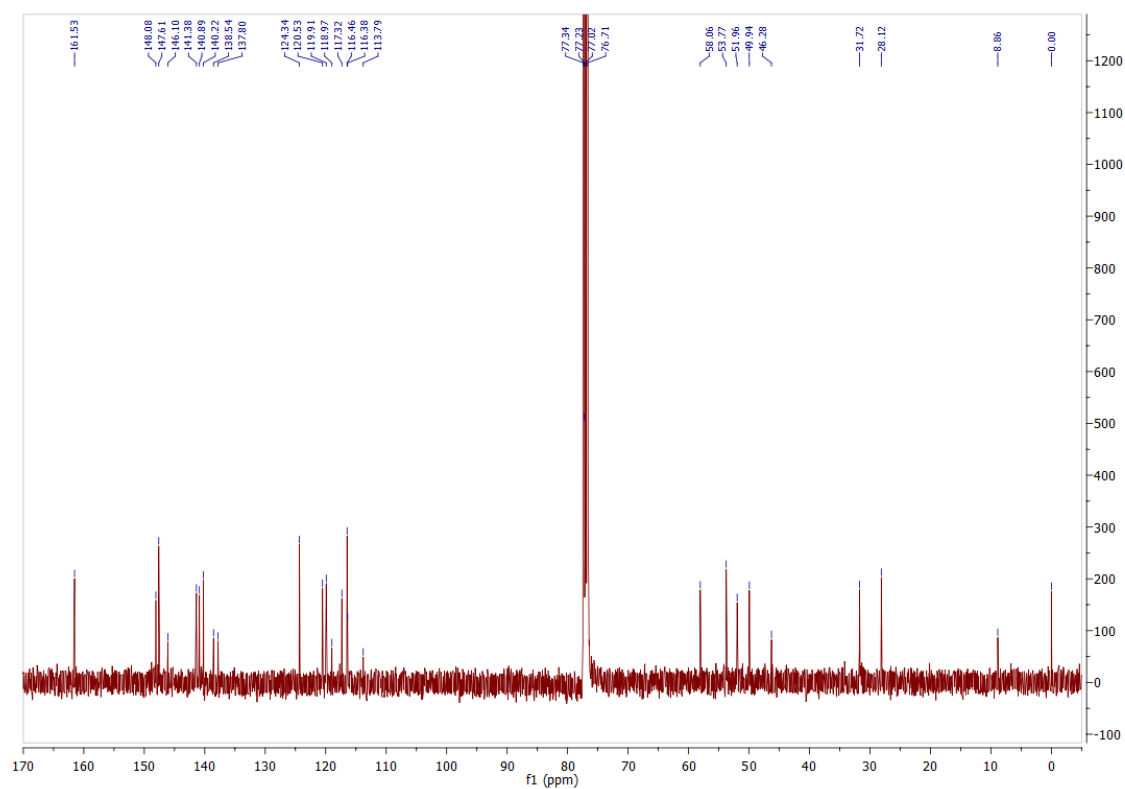



1-(2-(6-methoxy-1,5-naphthyridin-4-yl)ethyl)-N-((6-(trifluoromethyl)pyridin-3-yl)methyl)piperidin-4-amine (**21**)

<sup>1</sup>H NMR (400 MHz, CDCl<sub>3</sub>)

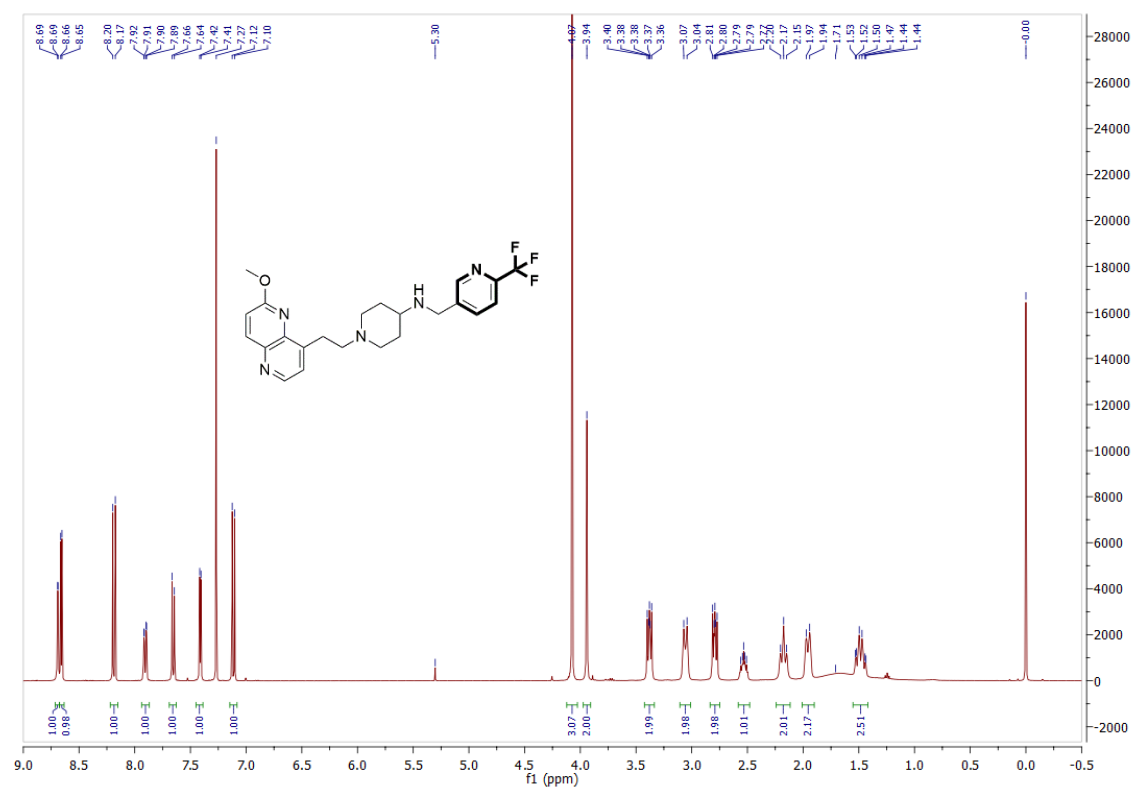

<sup>13</sup>C NMR (100 MHz, CDCl<sub>3</sub>)

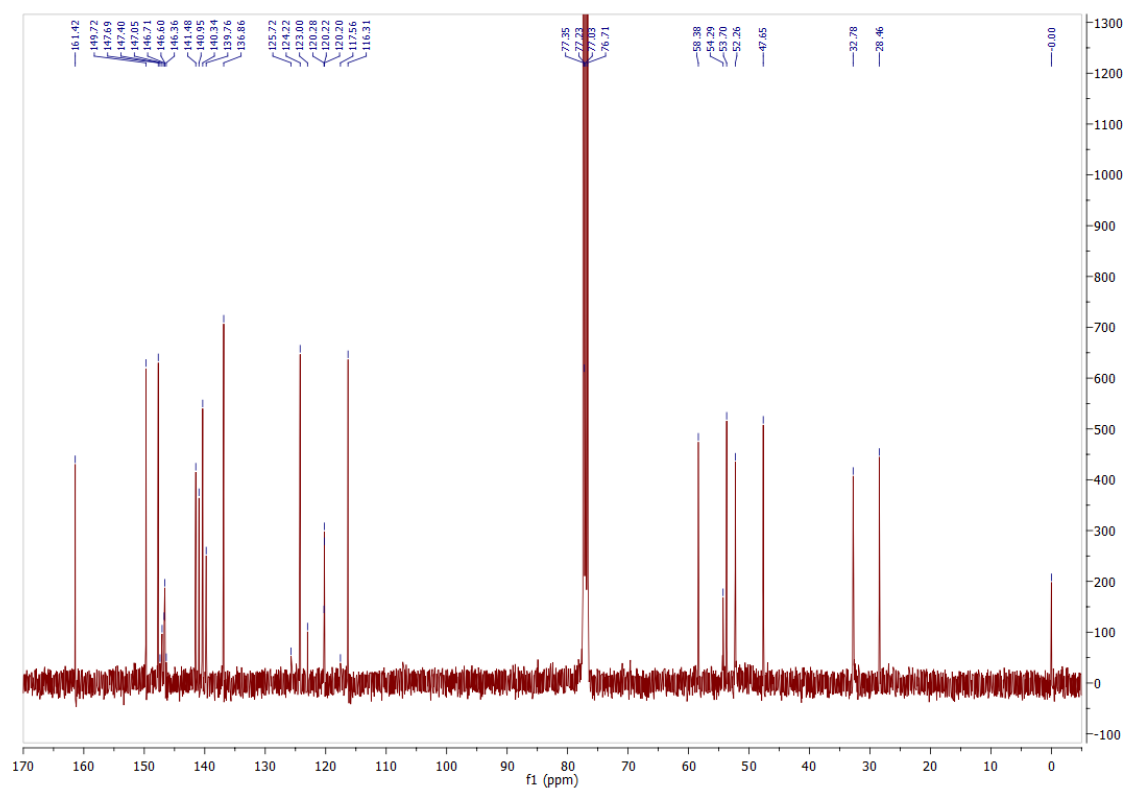

1-(2-(6-methoxy-1,5-naphthyridin-4-yl)ethyl)piperidin-4-amine **(22)**

$^1\text{H}$  NMR (400 MHz,  $\text{CDCl}_3$ )

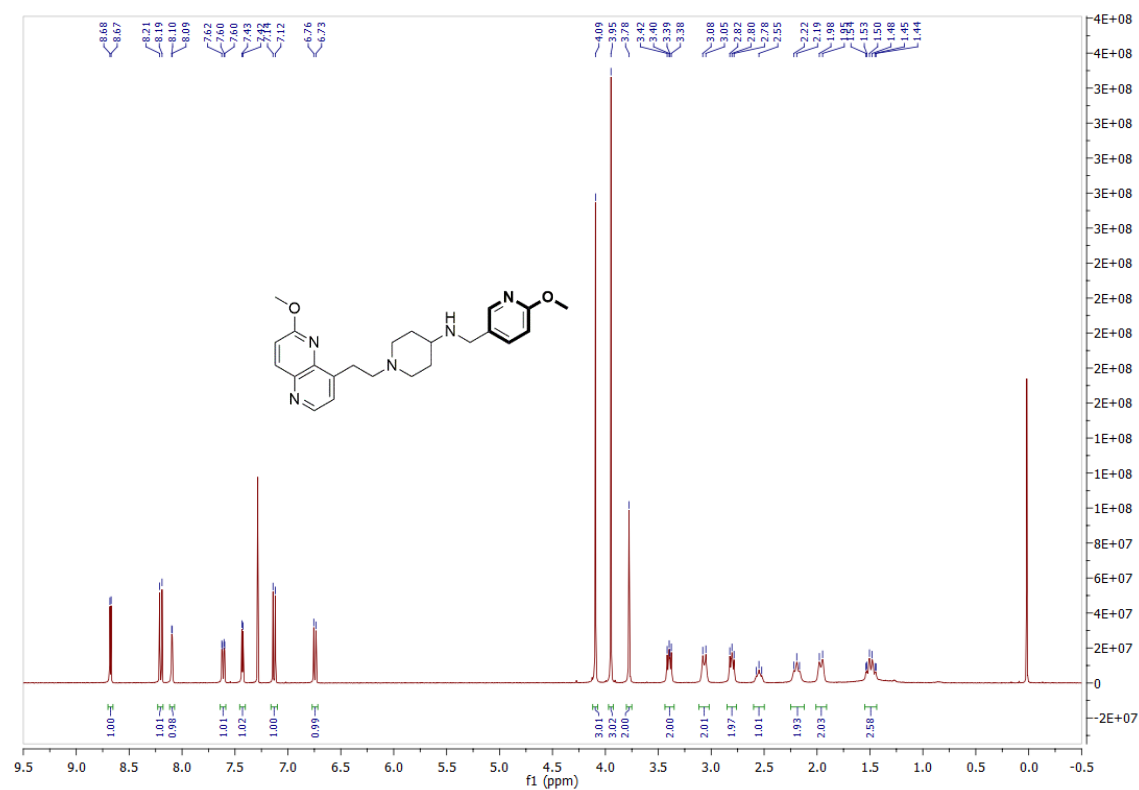

$^{13}\text{C}$  NMR (100 MHz,  $\text{CDCl}_3$ )

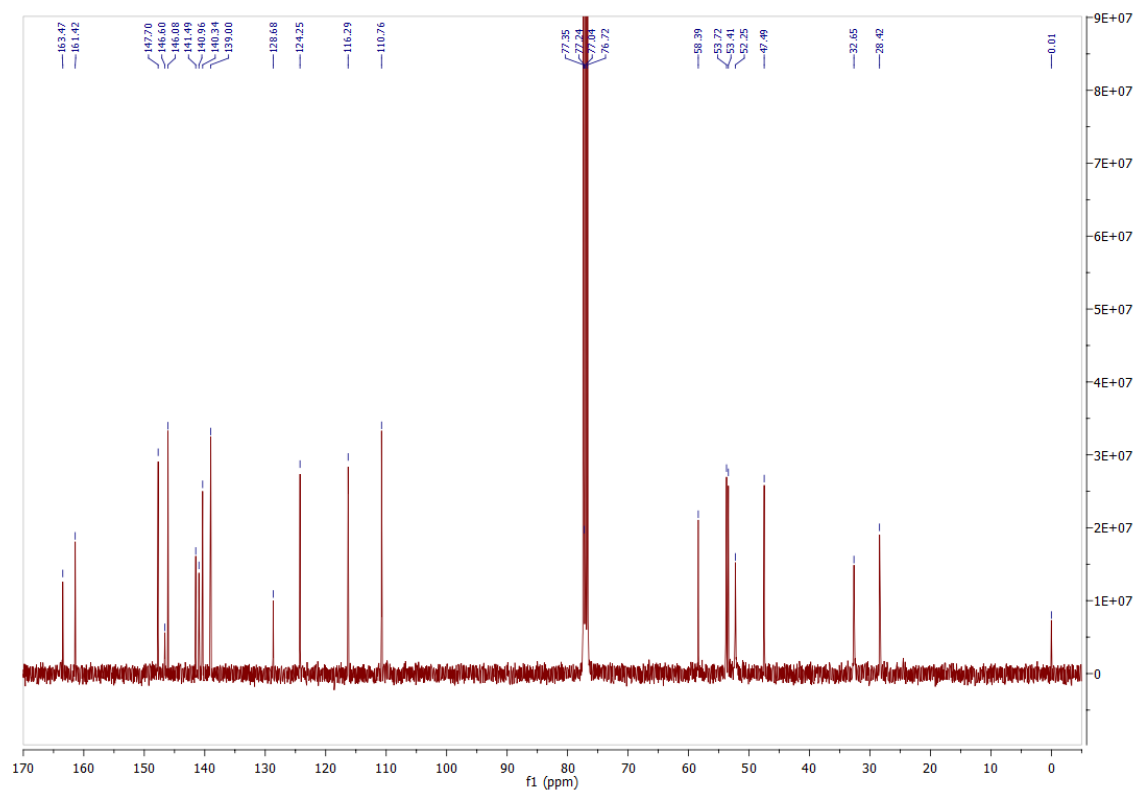

**Table S4. Minimal inhibitory concentration (MIC) in molar.**

| Compd | <i>S. aureus</i><br>MIC [ $\mu$ M] <sup>a</sup> | <i>E. coli</i><br>MIC [ $\mu$ M] <sup>b</sup> | <i>E. coli</i> N43<br>MIC [ $\mu$ M] <sup>c</sup> |
|-------|-------------------------------------------------|-----------------------------------------------|---------------------------------------------------|
| 3     | 2.32                                            | 297.29                                        | 37.16                                             |
| 4     | 4.34                                            | 69.48                                         | 4.34                                              |
| 5     | 0.57                                            | 36.15                                         | 2.26                                              |
| 6     | 287.91                                          | 287.91                                        | 287.91                                            |
| 7     | 280.99                                          | 280.99                                        | 280.99                                            |
| 8     | 1.13                                            | 144.29                                        | 2.26                                              |
| 9     | 0.31                                            | 19.58                                         | 0.61                                              |
| 10    | 4.92                                            | 39.36                                         | 2.46                                              |
| 11    | 10.62                                           | 169.99                                        | 21.25                                             |
| 12    | 2.54                                            | 81.12                                         | 10.14                                             |
| 13    | 0.30                                            | 9.73                                          | 1.22                                              |
| 14    | 0.07                                            | 4.39                                          | 0.27                                              |
| 15    | 0.01                                            | 3.98                                          | 0.16                                              |
| 16    | 9.84                                            | 314.87                                        | 39.36                                             |
| 17    | 4.77                                            | 305.11                                        | 38.14                                             |
| 18    | 0.31                                            | 78.53                                         | 2.45                                              |
| 19    | 2.12                                            | 67.72                                         | 2.12                                              |
| 20    | 1.09                                            | 17.45                                         | 1.09                                              |
| 21    | 0.56                                            | 71.83                                         | 2.25                                              |
| 22    | 1.19                                            | 38.14                                         | 2.38                                              |

<sup>a</sup>*S. aureus* ATCC 29213. <sup>b</sup>*E. coli* ATCC 25922. <sup>c</sup>*E. coli* CGSC# 5583; AcrA knockout strain (knockout of cell membrane efflux pump).

**Table S5. The metabolic activity of cells at 1  $\mu$ M and 50  $\mu$ M of tested compound represented as mean percent  $\pm$  SD.**

| Compd | HUVEC<br>MA (%)  |                 | HepG2<br>MA (%)  |                |
|-------|------------------|-----------------|------------------|----------------|
|       | 1 $\mu$ M        | 50 $\mu$ M      | 1 $\mu$ M        | 50 $\mu$ M     |
| 3     | 114.2 $\pm$ 10.3 | 87.6 $\pm$ 10.0 | 108.7 $\pm$ 10.7 | 28.4 $\pm$ 5.6 |
| 4     | 112.3 $\pm$ 6.7  | 0.3 $\pm$ 0.2   | 112.2 $\pm$ 11.6 | 0.3 $\pm$ 1.3  |
| 5     | 107.5 $\pm$ 4.4  | 0.2 $\pm$ 0.3   | 112.4 $\pm$ 7.5  | 0.4 $\pm$ 1.7  |
| 6     | 90.5 $\pm$ 20.8  | 56.4 $\pm$ 3.1  | 102.9 $\pm$ 3.8  | 0.4 $\pm$ 0.8  |

|    |              |             |              |            |
|----|--------------|-------------|--------------|------------|
| 7  | 93.7 ± 12.9  | 36.5 ± 2.6  | 111.0 ± 10.1 | 0.8 ± 1.2  |
| 8  | 98.5 ± 7.7   | 35.0 ± 7.2  | 110.0 ± 10.6 | 0.7 ± 0.3  |
| 9  | 92.0 ± 1.7   | 86.9 ± 3.9  | 104.8 ± 1.8  | 68.5 ± 7.0 |
| 10 | 88.6 ± 21.2  | 84.2 ± 19.5 | 108.5 ± 6.3  | 77.0 ± 2.4 |
| 11 | 92.9 ± 16.6  | 63.4 ± 11.3 | 107.1 ± 7.2  | 1.4 ± 0.3  |
| 12 | 105.2 ± 15.1 | 75.6 ± 12.0 | 98.0 ± 3.9   | -1.3 ± 2.2 |
| 13 | 86.1 ± 17.1  | -0.6 ± 0.4  | 84.5 ± 11.1  | 0.9 ± 0.1  |
| 14 | 92.0 ± 4.5   | -0.5 ± 0.2  | 84.3 ± 8.9   | -0.1 ± 0.3 |
| 15 | 108.0 ± 6.6  | -0.3 ± 0.5  | 102.6 ± 2.3  | 0.5 ± 0.3  |
| 16 | 97.7 ± 9.4   | 63.1 ± 2.1  | 100.2 ± 1.5  | 24.1 ± 0.9 |
| 17 | 105.8 ± 3.5  | 66.1 ± 3.5  | 94.0 ± 0.8   | 48.3 ± 1.0 |
| 18 | 105.9 ± 0.9  | 0.1 ± 0.6   | 102.5 ± 2.3  | 0.8 ± 1.0  |
| 19 | 89.6 ± 3.8   | 0.2 ± 1.0   | 89.7 ± 3.8   | -0.3 ± 2.1 |
| 20 | 96.4 ± 9.1   | 2.5 ± 0.3   | 100.5 ± 4.8  | -0.4 ± 1.6 |
| 21 | 107.0 ± 5.4  | 99.0 ± 1.9  | 102.6 ± 4.7  | 91.9 ± 8.2 |
| 22 | 98.3 ± 4.9   | 73.9 ± 2.2  | 104.5 ± 2.5  | 5.1 ± 1.3  |

## REFERENCES

(1) Kolarič, A.; Novak, D.; Weiss, M.; Hrast, M.; Zdovc, I.; Anderluh, M.; Minovski, N. Cyclohexyl amide-based novel bacterial topoisomerase inhibitors with prospective GyrA-binding fragments. *Future Med. Chem.* **2019**, *11*, 935–945.

(2) Bax, B. D.; Chan, P. F.; Eggleston, D. S.; Fosberry, A.; Gentry, D. R.; Gor-rec, F.; Giordano, I.; Hann, M. M.; Hennessy, A.; Hibbs, M.; Huang, J.; Jones, E.; Jones, J.; Brown, K. K.; Lewis, C. J.; May, E. W.; Saunders, M. R.; Singh, O.; Spitzfaden, C. E.; Shen, C.; Shillings, A.; Theobald, A. J.; Wohlkonig, A.; Pearson, N. D.; Gwynn, M. N. Type IIA topoisomerase inhibition by a new class of antibacterial agents. *Nature* **2010**, *466*, 935–940.

(3) Singh, S. B.; Kaelin, D. E.; Wu, J.; Miesel, L.; Tan, C. M.; Meinke, P. T.; Ol-sen, D.; Lagrutta, A.; Bradley, P.; Lu, J.; Patel, S.; Rickert, K. W.; Smith, R. F.; Soisson, S.; Wei, C.; Fukuda, H.; Kishii, R.; Takei, M.; Fukuda, Y. Oxa-bicyclooctane-linked novel bacterial topoisomerase inhibitors as broad spectrum antibacterial agents. *ACS Med. Chem. Lett.* **2014**, *5*, 609–614.

(4) Surivet, J. P.; Zumbunn, C.; Rueedi, G.; Bur, D.; Bruyère, T.; Locher, H.; Ritz, D.; Seiler, P.; Kohl, C.; Ertel, E. A.; Hess, P.; Gauvin, J. C.; Mirre, A.; Kaegi, V.; Dos Santos, M.; Kraemer, S.; Gaertner, M.; Delers, J.; Enderlin-Paput, M.; Weiss, M.; Sube, R.; Hadana, H.; Keck, W.; Hubschwerlen, C. Novel tetrahydropyran-based bacterial topoisomerase inhibitors

with potent anti-gram positive activity and improved safety profile. *J. Med. Chem.* **2015**, *58*, 927–942.

(5) Hearnshaw, S. J.; Edwards, M. J.; Stevenson, C. E.; Lawson, D. M.; Maxwell, A. A New Crystal Structure of the Bifunctional Antibiotic Simocyclinone D8 Bound to DNA Gyrase Gives Fresh Insight into the Mechanism of Inhibition. *J. Mol. Biol.* **2014**, *426*, 2023-2033.

(6) Veselkov, D.A.; Laponogov, I.; Pan, X.S.; Selvarajah, J.; Skamrova, G.B.; Branstrom, A.; Narasimhan, J.; Prasad, J.V.; Fisher, L.M.; Sanderson, M.R. Structure of a quinolone-stabilized cleavage complex of topoisomerase IV from *Klebsiella pneumoniae* and comparison with a related *Streptococcus pneumoniae* complex *Acta Cryst. D Struct. Biol.* **2016**, *72*, 488-496.

(7) Kolarič, A.; Germe, T.; Hrast, M.; Stevenson, C. E. M.; Lawson, D. M.; Burton, N. P.; Vörös, J.; Maxwell, A.; Minovski, N.; Anderluh, M. Potent DNA gyrase inhibitors bind asymmetrically to their target using symmetrical bifurcated halogen bonds. *Nat. Commun.* **2021**, *12*, 1-13.
